# Supplementary material for: Contrasting impacts of a novel specialist vector on multihost viral pathogen epidemiology in wild and managed bees
Source: PubMed Central journal article supplement (PMC7003859; doi:10.1111/mec.15333), 2020-01-07
Supplement: MEC-29-380-s001.pdf [file MEC-29-380-s001.pdf]

**Supplementary material for:**

**Contrasting impacts of a novel specialist vector on multi-host viral pathogen  
epidemiology in wild and managed bees**

Running title: Contrasting epidemiology of multi-host viruses

Authors: Manley, R.<sup>\*1,2</sup>, Temperton, B.<sup>2</sup>, Boots, M.<sup>3</sup> and Wilfert, L.<sup>1,4</sup>

Affiliations:

1. Centre for Ecology and Conservation, University of Exeter, Penryn Campus, Penryn TR11 9FE, UK
2. Department of Biosciences, University of Exeter, Streatham Campus, Exeter, EX4 4QD, UK
3. Department of Integrative Biology, University of California, Berkeley, CA, 94720, USA.
4. Institute of Evolutionary Ecology and Conservation Genomics, University of Ulm, D-89069 Ulm, Germany.

\*Materials & Correspondence to:

Robyn Manley

Address: Department of Biosciences, GP309, University of Exeter, Streatham Campus, Exeter, EX4 4QD, UK.

Telephone: 01392 725 296

Email: [r.manley@exeter.ac.uk](mailto:r.manley@exeter.ac.uk)

*Supplementary tables*

Table S1. The town and location of field site, and the total number of each bee species collected from each site. Note. *Bombus terrestris* and *B. lucorum* are cryptic and required molecular identification post-collection

| Location                      | <i>Varroa</i> -<br>status | <i>A. mellifera</i> | <i>B. terrestris</i> | <i>B. lucorum</i> | <i>B. pascuorum</i> |
|-------------------------------|---------------------------|---------------------|----------------------|-------------------|---------------------|
| Guernsey (St Peter Port)      | <i>Varroa</i> -           | 22                  | 45                   | 15                | 32                  |
| Jersey (St Helier)            | present-                  | 30                  | 59                   | 1                 | 33                  |
| Belle-Ile (Le Palais)         | islands                   | 29                  | 59                   | 1                 | 19                  |
| Alderney (St Anne)            | <i>Varroa</i> -           | 30                  | 57                   | 3                 | 30                  |
| Isles of Scilly (St Mary's)   | free-                     | 30                  | 60                   | 0                 | 0                   |
| Ile d'Ouessant                | islands                   | 30                  | 13                   | 2                 | 29                  |
| Isle of Man (Douglas)         |                           | 32                  | 53                   | 5                 | 29                  |
| Quiberon, Brittany            | <i>Varroa</i> -           | 30                  | 59                   | 0                 | 1                   |
| Cherbourg (marina area)       | present-                  | 30                  | 61                   | 3                 | 30                  |
| Penryn (University<br>campus) | mainland                  | 30                  | 56                   | 5                 | 30                  |
| Le Conquet, Brittany          |                           | 33                  | 59                   | 2                 | 19                  |
| Liverpool, city centre        |                           | 29                  | 59                   | 0                 | 29                  |

Table S2. Primers and protocols to differentiate between *Bombus terrestris/lucorum* species complex, and detect prevalence of Black queen cell virus (BQCV) and Slow bee paralysis virus (SBPV). Note \*BQCV primers were used for nucleotide sequencing, while the same SBPV primers were used for both prevalence and sequencing.

| Target                               | Primer name                | Sequence                                         | Amplification program                                                                                                                                            | Amplicon (bp) | Reference                                  |
|--------------------------------------|----------------------------|--------------------------------------------------|------------------------------------------------------------------------------------------------------------------------------------------------------------------|---------------|--------------------------------------------|
| <i>B. terrestris/lucorum</i> complex | BBM1_IGSF-1<br>BBM1_IGS_R  | GGAGCAATAATTTCAATAAATAG<br>AARTTCAAAGCACTAATCTGC | 15 s at 95C<br>15 s at 55C<br>45 s at 72C<br>x38 cycles                                                                                                          | 180<br>210    | Regular Schmid-Hempel ( <i>pers comm</i> ) |
| BQCV (for PCR)                       | BQCV4119<br>BQCV5476       | TCCyCCAGTTCAACCATCTA<br>AACGTTGCCTAGrTTCGTCA     | 15 s at 95C,<br>30 s at 60C,<br>60 s at 72C<br>x40 cycles                                                                                                        | 1257          | Lena Wilfert ( <i>pers comm</i> )          |
| *BQCV (for sequencing)               | BQCVLF_6527<br>BQCVLR_7513 | GCGKGCCAAAGAGAGTAAGG<br>TTGyTGTTCAAGTCCCGAAT     | Touchdown PCR 62C<br>15 s at 95C,<br>30 s at 62C,<br>60 s at 72C<br>X10 cycles<br><br>15 s at 95C,<br>30 s at 60 <sup>2</sup> →52C,<br>60 s at 72C<br>X30 cycles | 986           | Lena Wilfert ( <i>pers comm</i> )          |
| SBPV                                 | SBPV_F3168<br>SBPV_B4193   | ATGCGTGATGGTCATATCC<br>CGGTCGCTTGGTGAAAGTAT      | Touchdown PCR 60C<br>15 s at 95C,<br>30 s at 60C,<br>60 s at 72C<br>x10 cycles<br><br>15 s at 95C,<br>30 s at 60 →50C,<br>60 s at 72C<br>x30 cycles              | 955           | Lena Wilfert ( <i>pers comm</i> )          |

Table S3. Primers and protocols used for qPCR amplification and to create plasmids for standard curves used in qPCR assays.

| Primer                   | Sequence                                       | Amplification program                                           | Amplicon (bp) | Reference                       |
|--------------------------|------------------------------------------------|-----------------------------------------------------------------|---------------|---------------------------------|
| SBPV_F3177<br>SBPV_B3363 | GCGCTTTAGTTCAATTGCC<br>ATTATAGGACGTGAAAATATAC  | 10 s at 95C,<br>30 s at 60C,<br>X40 cycles                      | 186           | de Miranda <i>et al.</i> (2010) |
| BQCV_F7893<br>BQCV_B8150 | AGTGGCGGAGATGTATGC<br>GGAGGTGAAGTGGCTATATC     |                                                                 | 257           | Locke <i>et al.</i> (2012)      |
| Rp49_qF<br>Rp49_qB       | AAGTTCATTCGTCACCAGAG<br>CTTCCAGTTCCTTGACATTATG | Melting curve profile:<br>55 – 95C (0.5C per second increments) |               | de Miranda and Fries (2008)     |

Table S4. BQCV and SBPV alignment details: \* note, 7 *B. lucorum* were also sequenced for SBPV but removed from the BQCV alignment because of small sample size

| Virus  | Genbank     | Length | N total seqs | N <i>A.mellifera</i> sequences | N. <i>B.terrestris</i> sequences | N. <i>B.pascuorum</i> sequences |
|--------|-------------|--------|--------------|--------------------------------|----------------------------------|---------------------------------|
| BQCV   | NC0003784.1 | 432    | 69           | 52                             | 16                               | 1                               |
| SBPV * | GU938761.1  | 535    | 78           | 20                             | 19                               | 32                              |

Table S5. Substitution models for BQCV and SBPV alignments based on jModelTest (Guindon & Gascuel 2003; Darriba *et al.* 2012). Results of path sampling maximum likelihood estimator analysis comparing demographic and molecular clock models run in Beast 1.8. Analyses of each model in Tracer showed that a strict molecular clock could be excluded from both models; there was no significant exponential growth. Bold text highlights the chosen model for each alignment.

| Fragment | Substitution model | Molecular clock | Population demography |             |             |
|----------|--------------------|-----------------|-----------------------|-------------|-------------|
|          |                    |                 | Constant              | Exponential | GMRFSkyride |
| BQCV     | HKY + I + G        | Strict          | -1744.59              | -1744.02    | -1829.75    |
|          |                    | Exponential     | <b>-1741.92</b>       | -1739.38    | -1810.10    |
|          |                    | Lognormal       | -1744.27              | -1740.74    | -1801.56    |
| SBPV     | HKY + G            | Strict          | -1790.59              | -1793.56    | -1913.68    |
|          |                    | Exponential     | -1780.61              | -1774.47    | -1847.92    |
|          |                    | Lognormal       | <b>-1774.55</b>       | -1775.58    | -1787.82    |

Table S6. List of reference virus genomes used in BWA to align SMRT sequence reads. \* DWV-C sequences can be found at <http://www.ebi.ac.uk/ena/data/view/CEND01000001>

| Virus                                                         | Full virus name                  | Genbank Reference      |
|---------------------------------------------------------------|----------------------------------|------------------------|
| BQCV                                                          | Black queen cell virus           | NC-0003784             |
| SBPV Harpenden                                                | Slow bee paralysis virus         | GU93876                |
| SBPV Roththamsted                                             | Slow bee paralysis virus         | EU035616               |
| DWV-A                                                         | Deformed wing virus A            | NC-004830              |
| DWV-B                                                         | Deformed wing virus B            | NC-006494              |
| DWV-C                                                         | Deformed wing virus C            | ENA: CEN01000001*      |
| SBV                                                           | Sacbrood virus                   | AF092924               |
| ABPV                                                          | Acute bee paralysis virus        | NC-002548              |
| KBV                                                           | Kashmir bee virus                | NC-004807              |
| IAPV                                                          | Israeli acute paralysis virus    | KY243933               |
| CBPV                                                          | Chronic bee paralysis virus      | NC-010711 and NC010712 |
| LSv 1                                                         | Lake Sinai virus 1               | HQ871931               |
| LsV 2                                                         | Lake Sinai virus 2               | HQ888865               |
| Alpv                                                          | Aphid lethal paralysis virus     | KJ817182               |
| AmFv                                                          | Apis mellifera filamentous virus | NC- 027925             |
| <b>New bumblebee viruses<br/>(Pascall <i>et al.</i> 2018)</b> | N/A                              | N/A                    |
| Acry1                                                         |                                  |                        |
| Bloom1                                                        |                                  |                        |
| Bloom2                                                        |                                  |                        |
| Bloom3                                                        |                                  |                        |
| Bou1                                                          |                                  |                        |
| Bou2                                                          |                                  |                        |
| Bou3                                                          |                                  |                        |
| Corn1                                                         |                                  |                        |
| Dia1                                                          |                                  |                        |
| Dicist_Full                                                   |                                  |                        |
| Dicist_Half                                                   |                                  |                        |
| Grange1                                                       |                                  |                        |
| I1                                                            |                                  |                        |
| I2                                                            |                                  |                        |
| Mut1                                                          |                                  |                        |

|          |  |  |
|----------|--|--|
| N1       |  |  |
| N2       |  |  |
| Sac1     |  |  |
| Toti1    |  |  |
| Toti2    |  |  |
| Toti3    |  |  |
| Toti4    |  |  |
| Wuchang1 |  |  |

Table S7. Heat map of proportion (%) of number of PacBio sequencing reads for each virus out of the total read number. Only viruses that were present in more than one population and > 5% of the total number of reads are displayed.

| Host         | Site   | <i>Varroa</i> | N reads | Virus SR | DWV A | DWV B | Amfv  | BQCV | SBPV (Harp) | SBPV (Roth) | SBV  |
|--------------|--------|---------------|---------|----------|-------|-------|-------|------|-------------|-------------|------|
| <i>A.mel</i> | Liv    | y             | 12109   | 7        | 0.10  | 69.14 | 0.50  | 0.55 | 2.36        | 19.94       | 7.39 |
| <i>B.ter</i> | Liv    | y             | 2730    | 8        | 0.00  | 58.79 | 9.45  | 0.73 | 8.28        | 11.72       | 7.44 |
| <i>A.mel</i> | IOM    | n             | 2280    | 10       | 0.04  | 33.55 | 51.89 | 1.45 | 3.42        | 5.88        | 3.38 |
| <i>B.ter</i> | IOM    | n             | 347     | 9        | 0.29  | 64.55 | 7.49  | 1.15 | 7.20        | 10.37       | 8.07 |
| <i>A.mel</i> | Le Con | y             | 8704    | 7        | 0.03  | 99.17 | 0.60  | 0.00 | 0.00        | 0.00        | 0.00 |
| <i>B.ter</i> | Le Con | y             | 147     | 3        | 0.68  | 97.96 | 0.68  | 0.00 | 0.00        | 0.00        | 0.00 |
| <i>A.mel</i> | Ush    | n             | 430     | 4        | 0.00  | 53.49 | 45.81 | 0.23 | 0.00        | 0.00        | 0.00 |
| <i>B.ter</i> | Ush    | n             | 642     | 4        | 0.00  | 91.59 | 3.43  | 0.00 | 0.00        | 0.00        | 0.00 |

Table S8. Predicted proportions (%) of pathogen prevalence for three bee species when *Varroa* is present and absent (conversion of GLMM (table 2) estimates on the logit scale to proportions using formula  $\exp(x)/(1+\exp(x))$ , where x equals the parameter estimate).

| Response | Species              | Prevalence when <i>Varroa</i> absent | Prevalence when <i>Varroa</i> present |
|----------|----------------------|--------------------------------------|---------------------------------------|
| BQCV     | <i>A. mellifera</i>  | 6.78                                 | 60.61                                 |
|          | <i>B. pascuorum</i>  | 0.064                                | 1.34                                  |
|          | <i>B. terrestris</i> | 0.45                                 | 8.74                                  |
| SBPV     | All species          | 0.04                                 | 5.95                                  |

Table S9. Bayes factors a) support for BQCV transmission between hosts b) support for BQCV transmission between locations

a)

| donor | receiver |    |      |
|-------|----------|----|------|
|       | Am       | Bt | Bp   |
| Am    | NA       | ns | 7.91 |
| Bt    | ns       | NA | 4.94 |
| Bp    | ns       | ns | NA   |

b)

| donor     | receiver |     |     |      |       |      |       |     |      |     |
|-----------|----------|-----|-----|------|-------|------|-------|-----|------|-----|
|           | IOM      | Liv | Fal | Jer  | Guern | Cher | Brest | Ush | Bell | Qui |
| IOM       | NA       | 250 | 72  | ns   | 73    | ns   | 1559  | 173 | 287  | 78  |
| Liverpool | ns       | NA  | ns  | ns   | 273   | ns   | ns    | 190 | ns   | 333 |
| Falmouth  | 283      | 83  | NA  | ns   | 160   | 348  | 2936  | ns  | 301  | 81  |
| Jersey    | ns       | ns  | ns  | NA   | 349   | 1150 | 39    | 72  | ns   | ns  |
| Guernsey  | 152      | 71  | 84  | 69   | NA    | 5804 | ns    | ns  | 116  | 120 |
| Cherbourg | ns       | ns  | 137 | 195  | 141   | NA   | ns    | ns  | 130  | ns  |
| Brest     | 461      | 175 | 573 | 1013 | ns    | ns   | NA    | ns  | 75   | 77  |
| Ushant    | ns       | 591 | ns  | 53   | 85    | ns   | 544   | NA  | 94   | 49  |
| Belle Ile | 129      | ns  | ns  | 101  | 49    | ns   | 44    | ns  | NA   | 79  |
| Quiberon  | 1544     | 598 | 69  | ns   | 131   | ns   | 172   | 87  | 143  | NA  |

Table S10. Bayes factors SBPV a) support for SBPV transmission between hosts b) support for SBPV transmission between locations

a)

| donor | receiver |        |       |       |
|-------|----------|--------|-------|-------|
|       | Am       | Bt     | Bl    | Bp    |
| Am    | NA       | 9.89   | ns    | 30.14 |
| Bt    | 9.8456   | NA     | 9.937 | 11.33 |
| Bl    | ns       | 6.95   | NA    |       |
| Bp    | 28.78    | 10.705 |       | NA    |

b)

| donor     | recipient |            |          |       |           |
|-----------|-----------|------------|----------|-------|-----------|
|           | Cherbourg | Jersey     | Guernsey | IOM   | Liverpool |
| Cherbourg | NA        | 61.15      | 39.69    | ns    | ns        |
| Jersey    | 23.5      | NA         | 19.72    | 21.54 | 42.17     |
| Guernsey  | 27.25     | no support | NA       | 23.54 | 31.24     |
| IOM       | ns        | 771.82     | 55.62    | NA    | ns        |
| Liverpool | ns        | ns         | 37.22    | ns    | NA        |

Supplementary figures

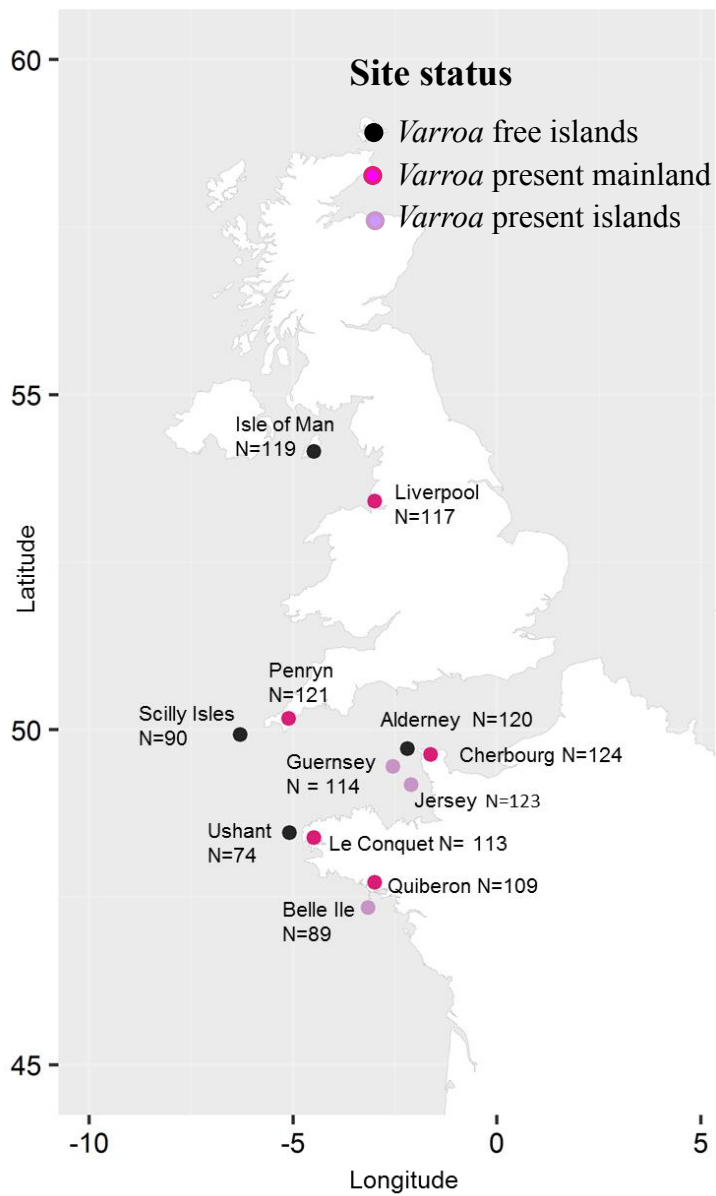

Figure S1. Sampling locations and sample sizes with *Varroa*-status shown by coloured circles.



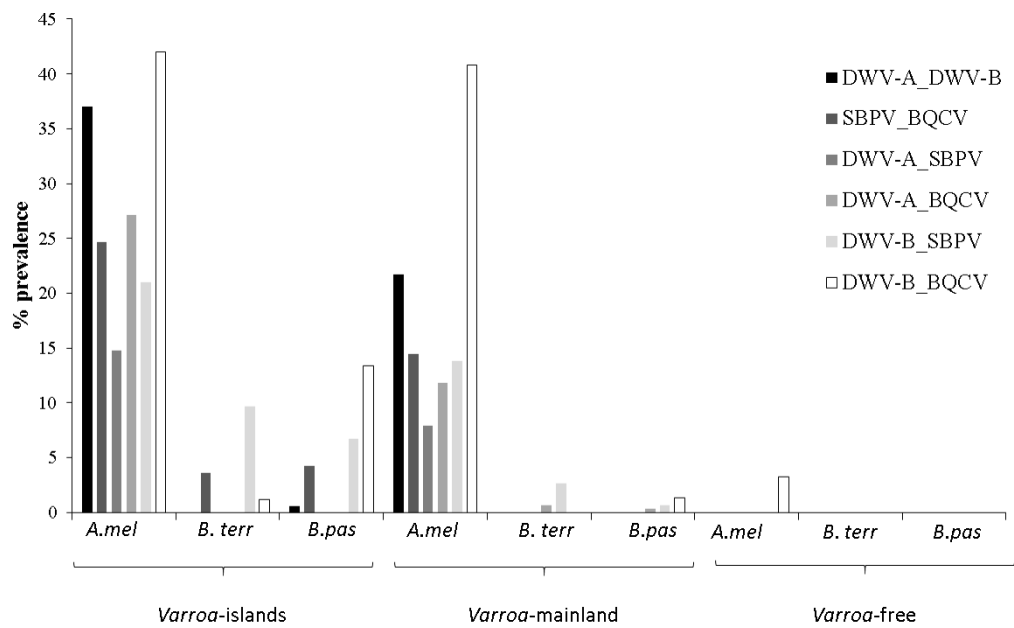

Figure S2. % prevalence of co-infections of four RNA viruses (DWV-A, DWV-B, SBPV and BQCV) by host species and *Varroa*-presence/absence (V+I = *Varroa*-present island, V+M = *Varroa*-present mainland, V- = *Varroa*-free islands).

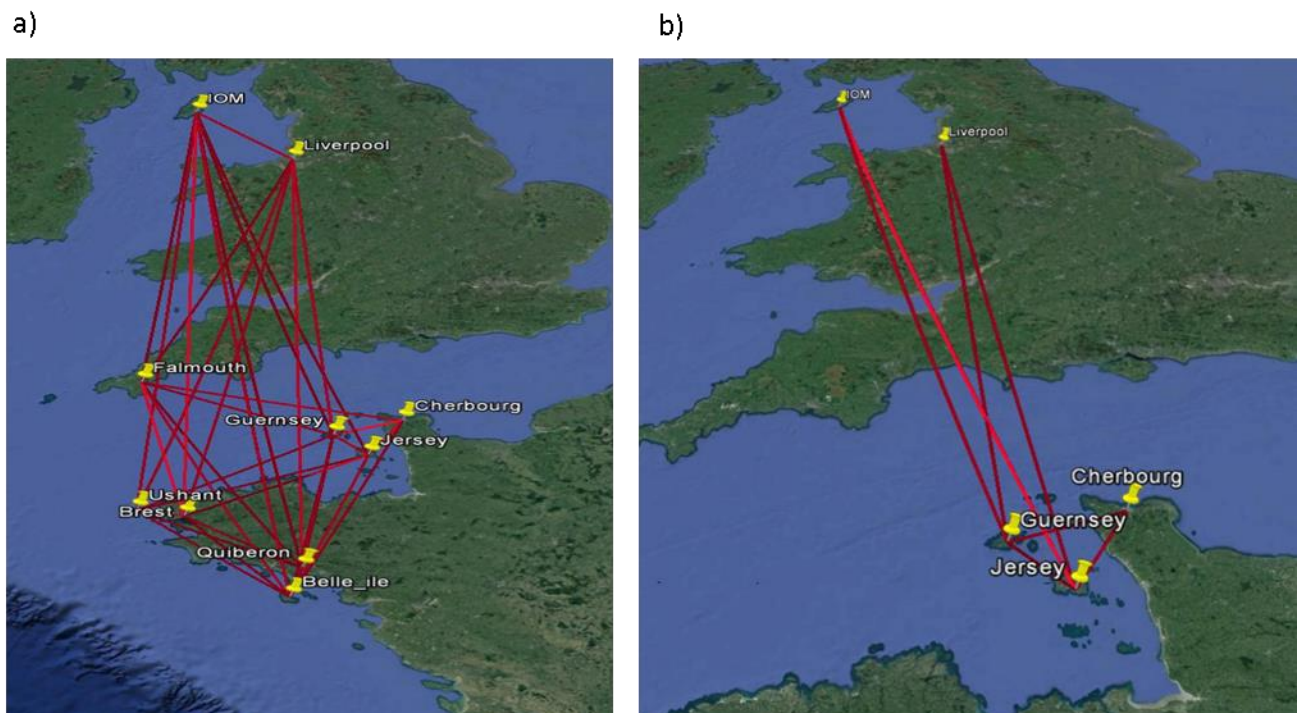

Figure S3. Map showing Bayes Factor support for BQCV (a) and SBPV (b) transmission routes between sampling locations, from Beast phylogenetic analysis

**a) BQCV maximum clade credibility tree**

**Tip label key**

- Guernsey
- Liverpool
- Jersey
- Cherbourg
- Falmouth
- Ushant
- Isle of Man
- Belle Ile
- Le Conquet
- Quiberon

**Branch and node key**

- *A. mellifera*
- *B. terrestris*
- *B. pascuorum*

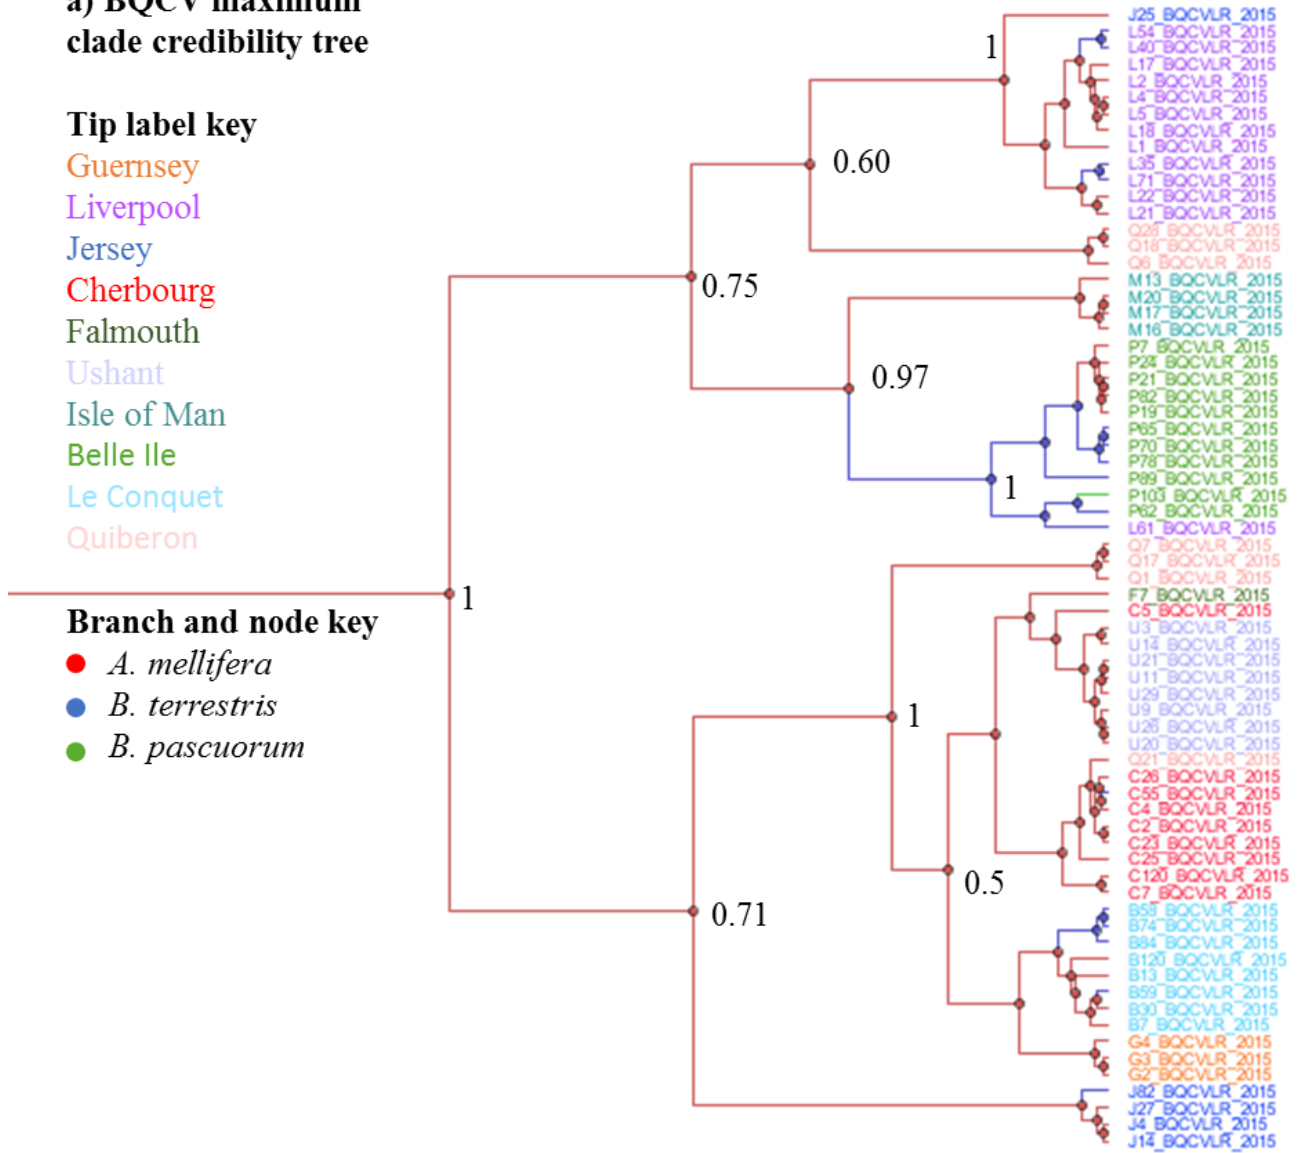

0.7

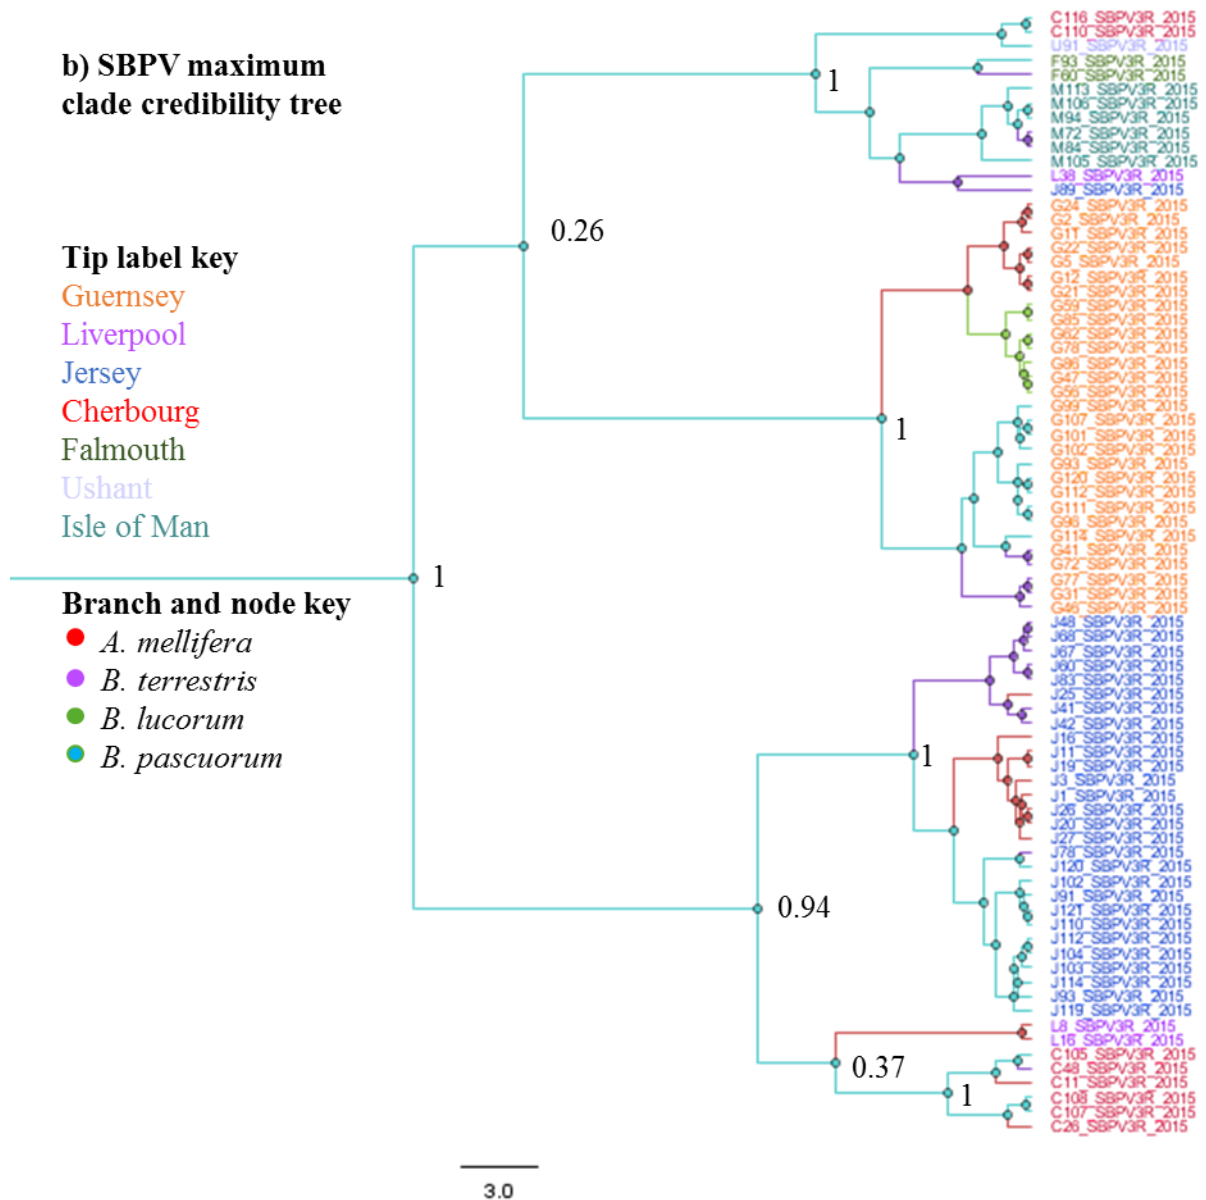

Figure S4. Maximum clade credibility (MCC) tree for BQCV (69 sequences of a 432nt fragment) (a) and SBPV (78 sequences of a 535nt fragment) (b) showing host and location structure. Branches and nodes are coloured according to host species and the branch tips are coloured by location (see key). Posterior support is indicated for nodes up to the 3rd order. The scale is time, in years.

## References

- Darriba, D., Taboada, G.L., Doallo, R. & Posada, D. (2012). jModelTest 2: more models, new heuristics and parallel computing. *Nature Methods*, 9, 772 DOI: <https://doi.org/10.1038/nmeth.2109>.
- de Miranda, J.R., Dainat, B., Locke, B., Cordonni, G., Berthoud, H., Gauthier, L. *et al.* (2010). Genetic characterization of Slow Bee Paralysis Virus of the honeybee (*Apis mellifera* L.). *Journal of General Virology*, 91, 2524-2530.
- de Miranda, J.R. & Fries, I. (2008). Venereal and vertical transmission of Deformed Wing Virus in honeybees (*Apis mellifera* L.). *Journal of Invertebrate Pathology*, 98, 184-189.
- Guindon, S. & Gascuel, O. (2003). A simple, fast and accurate method to estimate large phylogenies by maximum-likelihood. *Systematic Biology*, 52, 696-704.
- Locke, B., Forsgren, E., Fries, I. & De Miranda, J.R. (2012). Acaricide treatment affects viral dynamics in *Varroa destructor*-infested honey bee colonies via both host physiology and mite control. *Applied and Environmental Microbiology*, 78, 227-235.
- Pascall, D.J., Tinsley, M.C., Obbard, D., J, & Wilfert, L. (2018). Host evolutionary history predicts virus prevalence across bumblebee species *BioRxiv* DOI: <https://doi.org/10.1101/498717>.
